# Supplementary material for: Proteomics of Paracoccidioides lutzii: Overview of Changes Triggered by Nitrogen Catabolite Repression
Source: MDPI journal article supplement (doi:10.3390/jof9111102), 2023-11-12
Supplement: s1 [file s1]

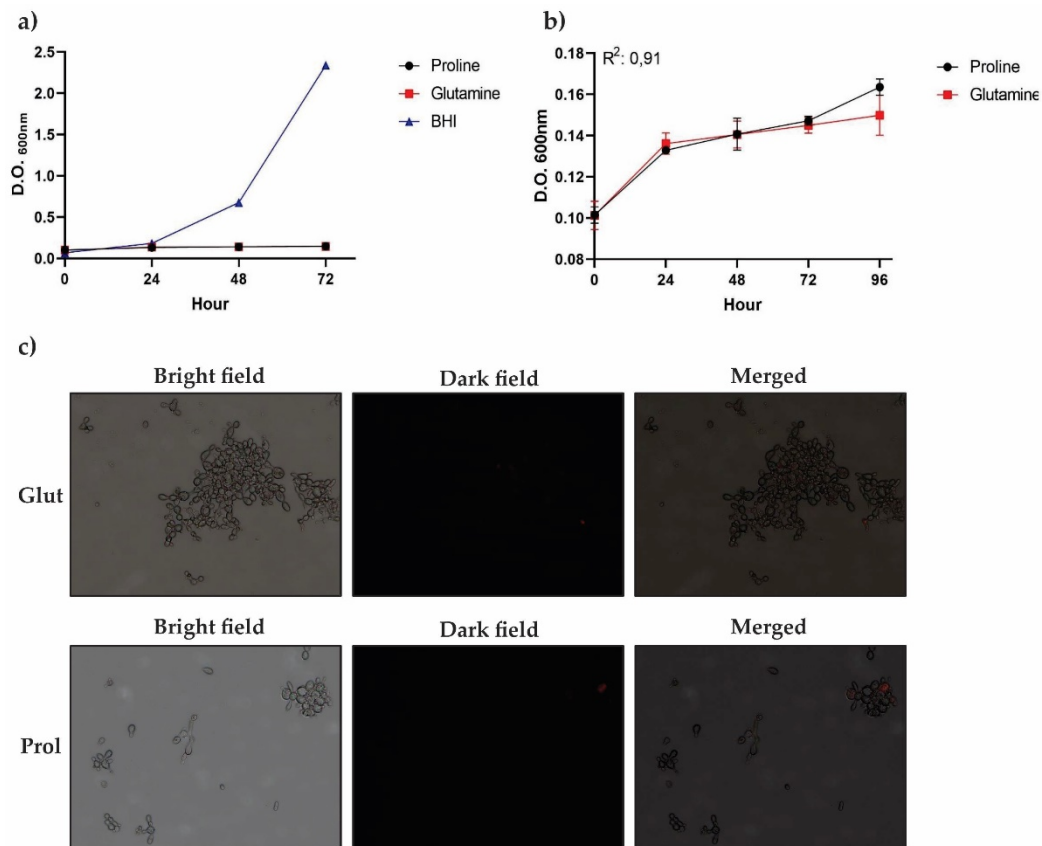

**Figure S1.** Viability of *P. lutzii* under NCR-conditions. **(a)** *P. lutzii* viability under BHI medium and NCR conditions, supplemented with 10mM of proline and 10 mM of glutamine. **(b)** Viability comparative of *P. lutzii* under NCR conditions. Data are expressed as the mean  $\pm$  standard deviation of the triplicate of independent experiments ( $p \leq 0.05$ ). Statistical comparisons were performed using Pearson correlation. **(c)** Viability assays were conducted at concentrations of 10 mM proline/or glutamine under NCR conditions. The frames were separated into upper (Glut) and lower (Prol), demonstrating the bright field (light microscopy), dark field (propidium iodide) and merged field (union between the dark and light frame). Non-viable *P. lutzii* yeast cells were stained with propidium iodide (1  $\mu\text{g/mL}$ ). Data are expressed as mean  $\pm$  standard deviation of triplicates of independent experiments ( $p \leq 0.05$ ). Statistical comparisons were performed using Pearson correlation. Prol: proline; Glut: glutamine. Magnification 40x.

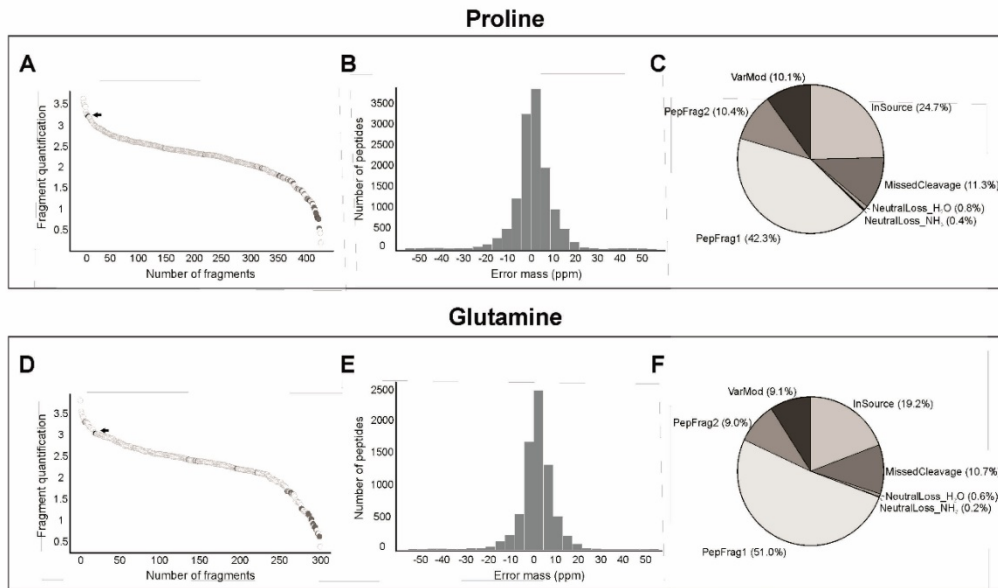

**Figure S2.** Quality analysis of *P. lutzii* proline and glutamine proteomic data. (a) and (d) - Dynamic Range. Protein data of each condition was used to calculate the order of magnitude of protein identification and determine the dynamic range. Regular, reverse and standard proteins are represented in blank, grey and black (arrow), respectively. Regular and reverse proteins indicate identified proteins using regular and reverse *P. lutzii* proteome database. The standard protein exhibited an acceptable quantification in both conditions. (b) and (e) - Peptide Mass Accuracy analyses. Peptide data was used to generate the bar graph showing the mass accuracy for peptides of each condition. The majority of peptides were detected with an error of less than 10 ppm in both proline and glutamine conditions. (c) and (f) - Peptide detection type. The pie graph brings the percentage of peptides matched against *P. lutzii* database by PLGS (PepFrag 1 and PepFrag 2), variables modifications (VarMod), fragmentation occurred in ionization source (InSource), missed cleavage by trypsin occurred during digestion (Missed Cleavage) and Neutral loss H<sub>2</sub>O and NH<sub>3</sub> corresponding, respectively, to water and ammonia precursor losses.

**Table S1.** List of primers used in RT-qPCR experiments.

| Gene / Accession number <sup>a</sup>          | Forward primer (5'-3') | Reverse primer (5'-3') |
|-----------------------------------------------|------------------------|------------------------|
| <i>Tubulin</i> / PAAG_03031                   | GAGCGATTCATTGGAGGGATT  | ATCAGGGAAAACAGAGTAAGTC |
| <i>Arginase</i> / PAAG_01969                  | TCCGGAGGCCAGAGCA       | TGACGGTGTAGCCTAGGTCT   |
| <i>Formamidase</i> /PAAG_03333                | GTTCTATCCCAATGCCGCAAA  | GCGCCTGTTCCATTCAGCTA   |
| <i>γ-Glutamyl transpeptidase</i> / PAAG_06130 | ACTGGTGGGTTGGCTAGCG    | GCGAATGGCAGGCTGCATG    |
| <i>Urease</i> / PAAG_00954                    | GAGATATATGTTTGGGGCACG  | ACCTCGACAATTACGCACCG   |

<sup>a</sup> Accession number of genes used in quantitative real time PCR from NCBI genome database (<https://www.ncbi.nlm.nih.gov/genome/?term=paracoccidioides>).

**Table S2.** *P. lutzii* up-regulated proteins under NCR conditions.

| Accession Number <sup>a</sup>                      | Protein name <sup>b</sup>                               | Score <sup>c</sup> | Fold change <sup>d</sup> |
|----------------------------------------------------|---------------------------------------------------------|--------------------|--------------------------|
| <b>METABOLISM</b>                                  |                                                         |                    |                          |
| <b>Amino acid metabolism</b>                       |                                                         |                    |                          |
| PAAG_02859                                         | Adenosylhomocysteinase                                  | 1172.15            | *                        |
| PAAG_07327                                         | Arginine biosynthesis bifunctional protein ArgJ         | 950.33             | *                        |
| PAAG_08065                                         | Aspartate-semialdehyde dehydrogenase                    | 1046.73            | *                        |
| PAAG_08163                                         | Fumarylacetoacetase                                     | 3595.62            | *                        |
| PAAG_00285                                         | Imidazole glycerol phosphate synthase hisHF             | 912.15             | *                        |
| PAAG_02644                                         | Kynurenine-oxoglutarate transaminase                    | 1567.78            | *                        |
| PAAG_08100                                         | O-acetylhomoserine (Thiol)-lyase                        | 1026.41            | *                        |
| PAAG_06096                                         | Phospho-2-dehydro-3-deoxyheptonate aldolase             | 1614.21            | *                        |
| PAAG_01302                                         | S-methyl-5'-thioadenosine phosphorylase                 | 783.05             | *                        |
| PAAG_04443                                         | Spermidine synthase                                     | 1061.64            | *                        |
| PAAG_07003                                         | Glutamine synthetase                                    | 1704.34            | *                        |
| PAAG_03138                                         | Alanine-glyoxylate aminotransferase                     | 1352.65            | *                        |
| PAAG_05328                                         | 3-isopropylmalate dehydrogenase                         | 1317.29            | *                        |
| PAAG_07467                                         | Dipeptidyl peptidase 3                                  | 889.36             | *                        |
| PAAG_06217                                         | Acetylornithine aminotransferase                        | 1067.15            | *                        |
| PAAG_00691                                         | Fumarylacetoacetate hydrolase domain-containing protein | 904.53             | 1.336427477              |
| PAAG_01568                                         | Glycine cleavage system P protein                       | 1341.16            | 1.336427477              |
| PAAG_08512                                         | Serine hydroxymethyltransferase                         | 1230.06            | 1.363425117              |
| PAAG_07036                                         | Methylmalonate-semialdehyde dehydrogenase               | 1164.09            | 1.377127754              |
| PAAG_06168                                         | Peptidyl-prolyl cis-trans isomerase                     | 2230.03            | 1.377127754              |
| PAAG_07114                                         | Argininosuccinate synthase                              | 1279.04            | 1.390968147              |
| PAAG_07760                                         | Threonine synthase                                      | 1058.95            | 1.404947596              |
| PAAG_01158                                         | phenylpyruvate tautomerase                              | 3328.09            | 1.404947596              |
| PAAG_07813                                         | Cysteine synthase                                       | 5107.64            | 1.491824707              |
| PAAG_07412                                         | Serine hydroxymethyltransferase                         | 1177               | 1.50681778               |
| PAAG_08718                                         | Succinate-semialdehyde dehydrogenase                    | 2972.25            | 1.616074385              |
| PAAG_07605                                         | Acetolactate synthase small subunit                     | 2070.52            | 2.095935534              |
| PAAG_01310                                         | 2-oxoisovalerate dehydrogenase subunit alpha            | 1504.79            | 2.1382762                |
| PAAG_05417                                         | Mitochondrial-processing peptidase subunit beta         | 1155.87            | 1.648721271              |
| PAAG_05253                                         | Delta-1-pyrroline-5-carboxylate dehydrogenase           | 1012.88            | 2.247907992              |
| PAAG_03045                                         | Aminomethyltransferase                                  | 2171.24            | 2.270499821              |
| PAAG_06387                                         | Homoisocitrate dehydrogenase                            | 918.92             | 2.293318702              |
| PAAG_07689                                         | NADP-specific Glutamate dehydrogenase                   | 867.37             | 2.316366916              |
| PAAG_01974                                         | Mitochondrial methylglutaconyl-CoA hydratase            | 2188.74            | 2.534509196              |
| PAAG_01991                                         | Homoserine dehydrogenase                                | 1686.54            | 2.944679677              |
| PAAG_06776                                         | Peptide methionine sulfoxide reductase msrA             | 1511.01            | 7.463317276              |
| PAAG_02217                                         | Isochorismatase domain-containing protein               | 2112.56            | 3.287081395              |
| <b>Nucleotide/nucleoside/nucleobase metabolism</b> |                                                         |                    |                          |
| PAAG_06906                                         | Adenine phosphoribosyltransferase                       | 785.27             | *                        |
| PAAG_00433                                         | Adenosine kinase                                        | 1005.07            | *                        |
| PAAG_02354                                         | Serine 3-dehydrogenase                                  | 1871.12            | *                        |
| PAAG_05803                                         | Inosine-5'-monophosphate dehydrogenase                  | 834.36             | 1.584073998              |

|                                                     |                                                         |         |             |
|-----------------------------------------------------|---------------------------------------------------------|---------|-------------|
| PAAG_06643                                          | Uracil phosphoribosyltransferase                        | 2054.03 | 1.840431425 |
| <b>C-compound and carbohydrate metabolism</b>       |                                                         |         |             |
| PAAG_00545                                          | Alpha-1.4 glucan phosphorylase/ glycon phosphorylase    | 878.38  | *           |
| PAAG_04478                                          | Dienelactone hydrolase family protein                   | 886.38  | 2.316366916 |
| PAAG_06083                                          | Dienelactone hydrolase family protein                   | 1354.83 | 1.599994191 |
| PAAG_04181                                          | Sorbitol utilization protein SOU2                       | 7006.95 | 2.054433269 |
| PAAG_05780                                          | 2.5-diketo-D-gluconic acid reductase A                  | 1502.34 | 4.349235265 |
| PAAG_03516                                          | Glucose-methanol-choline oxidoreductase                 | 864.79  | *           |
| PAAG_01935                                          | Formyl-coenzyme A transferase                           | 958.18  | *           |
| PAAG_05780                                          | D-xylose reductase                                      | 1502.34 | 4.349235265 |
| <b>Metabolism of cofactors and vitamins</b>         |                                                         |         |             |
| PAAG_08349                                          | C-1-tetrahydrofolate synthase                           | 754.22  | *           |
| PAAG_01324                                          | Folic acid synthesis protein                            | 5102.22 | *           |
| PAAG_01227                                          | 3-methyl-2-oxobutanoate hydroxymethyltransferase        | 1243.72 | *           |
| PAAG_08954                                          | GTP cyclohydrolase                                      | 1070.03 | *           |
| PAAG_02980                                          | Uncharacterized protein                                 | 848.69  | *           |
| PAAG_08856                                          | Nicotinate-nucleotide pyrophosphorylase [carboxylating] | 864.48  | 2.1382762   |
| PAAG_07321                                          | Pyridoxine biosynthesis protein PDX1                    | 1226.82 | 2.829216906 |
| PAAG_11728                                          | Aminopeptidase                                          | 789.48  | *           |
| PAAG_00664                                          | Aspartyl aminopeptidase                                 | 3021.46 | *           |
| PAAG_03719                                          | Thimet oligopeptidase / metallopeptidase MepB           | 1103.4  | *           |
| PAAG_04205                                          | Vacuolar aminopeptidase                                 | 1013.46 | *           |
| <b>Fatty acid biosynthesis and Lipid metabolism</b> |                                                         |         |             |
| PAAG_04489                                          | Acyl-protein thioesterase                               | 849.68  | *           |
| PAAG_07582                                          | Uncharacterized protein                                 | 990.78  | *           |
| PAAG_06406                                          | Fatty acid transporter protein                          | 780.17  | *           |
| PAAG_07492                                          | Ethanolamine-phosphate cytidyltransferase               | 787.37  | *           |
| PAAG_01536                                          | Trans-2-enoyl-CoA reductase                             | 838.46  | *           |
| PAAG_07347                                          | Phytanoyl-CoA dioxygenase family protein                | 780.3   | *           |
| PAAG_03631                                          | 12-oxophytodienoate reductase                           | 4433.5  | 1.934792385 |
| PAAG_06215                                          | Hydroxymethylglutaryl-CoA lyase                         | 859.44  | 2.509290432 |
| PAAG_00953                                          | NADH-cytochrome b5 reductase                            | 876.55  | 3.490342957 |
| <b>ENERGY</b>                                       |                                                         |         |             |
| <b>Glycolysis and gluconeogenesis</b>               |                                                         |         |             |
| PAAG_03243                                          | Glucose-6-phosphate 1-epimerase                         | 1845.01 | *           |
| PAAG_06526                                          | Glucose-6-phosphate isomerase                           | 3688.6  | *           |
| PAAG_06953                                          | Short chain dehydrogenase/reductase family              | 803.6   | *           |
| PAAG_03910                                          | Aldehyde dehydrogenase                                  | 3249.57 | *           |
| PAAG_02869                                          | Phosphoglycerate kinase                                 | 3045.31 | 1.41906754  |
| PAAG_00726                                          | Pyruvate carboxylase                                    | 1774.85 | 1.768267039 |
| PAAG_01995                                          | Fructose-bisphosphate aldolase 1                        | 3565.75 | 1.915540783 |
| PAAG_00403                                          | Alcohol dehydrogenase                                   | 1874.94 | 1.934792385 |
| PAAG_05249                                          | Aldehyde dehydrogenase                                  | 5071.08 | 2.054433269 |
| PAAG_08911                                          | Alcohol dehydrogenase                                   | 1047.18 | 2.1382762   |
| PAAG_01015                                          | Phosphotransferase /Hexokinase                          | 1658.53 | 2.773194711 |
| <b>Glyoxylate cycle</b>                             |                                                         |         |             |

|                                                                       |                                                              |          |             |
|-----------------------------------------------------------------------|--------------------------------------------------------------|----------|-------------|
| PAAG_06951                                                            | Isocitrate lyase                                             | 849.64   | *           |
| PAAG_04542                                                            | Malate synthase                                              | 1056.7   | 1.648721271 |
| PAAG_04550                                                            | Citrate synthase                                             | 2432.44  | 11.35888284 |
| <b>Tricarboxylic-acid pathway</b>                                     |                                                              |          |             |
| PAAG_05150                                                            | ATP-citrate synthase subunit 1                               | 1165.03  | *           |
| PAAG_05151                                                            | ATP-citrate-lyase                                            | 881.07   | *           |
| PAAG_00588                                                            | Fumarate hydratase                                           | 1503     | 1.323129814 |
| PAAG_00053                                                            | Malate dehydrogenase                                         | 16362.69 | 1.648721271 |
| PAAG_03330                                                            | Dihydrolipoyl dehydrogenase                                  | 4001.51  | 1.840431425 |
| PAAG_02769                                                            | Dihydrolipoamide acetyltransferase                           | 1091.95  | *           |
| PAAG_01556                                                            | FAD dependent oxidoreductase superfamily                     | 784.56   | *           |
| <b>Electron transport and membrane-associated energy conservation</b> |                                                              |          |             |
| PAAG_06268                                                            | Cytochrome c                                                 | 1392.83  | *           |
| PAAG_08551                                                            | ATP synthase subunit g                                       | 1369.04  | *           |
| PAAG_04570                                                            | ATP synthase subunit d. mitochondrial                        | 951.57   | 1.616074385 |
| PAAG_07921                                                            | cytochrome c oxidase assembly factor 6                       | 2805.94  | 2.339646908 |
| <b>Methylcitrate Cycle</b>                                            |                                                              |          |             |
| PAAG_04559                                                            | 2-methylcitrate dehydratase                                  | 4830.94  | 1.768267039 |
| <b>Pentose phosphate pathway</b>                                      |                                                              |          |             |
| PAAG_00633                                                            | Glucose-6-phosphate 1-dehydrogenase                          | 824.2    | *           |
| PAAG_02633                                                            | Ribose-phosphate pyrophosphokinase                           | 788.55   | *           |
| PAAG_01178                                                            | 6-phosphogluconate dehydrogenase. decarboxylating            | 1053.33  | 1.476980773 |
| PAAG_11415                                                            | Phosphoglucomutase                                           | 1020.36  | 1.599994191 |
| <b>Oxidation of fatty acids</b>                                       |                                                              |          |             |
| PAAG_05093                                                            | Succinyl-CoA:3-ketoacid-coenzyme A transferase               | 1329.64  | *           |
| PAAG_06224                                                            | Carnitine O-acetyltransferase                                | 737.96   | *           |
| PAAG_00435                                                            | (R)-benzylsuccinyl-CoA dehydrogenase/ Acyl-CoA dehydrogenase | 990.78   | *           |
| PAAG_06329                                                            | 3-hydroxybutyryl-CoA dehydrogenase                           | 3071.09  | 1.50681778  |
| PAAG_02664                                                            | 3-ketoacyl-CoA thiolase                                      | 2246.29  | 2.459603053 |
| <b>CELL WALL HOMEOSTASIS</b>                                          |                                                              |          |             |
| PAAG_04602                                                            | Mannosyl-oligosaccharide glucosidase                         | 915.53   | *           |
| PAAG_07150                                                            | UDP-galactopyranose mutase                                   | 1202.01  | *           |
| PAAG_06817                                                            | UTP--glucose-1-phosphate uridylyltransferase                 | 1160.54  | 1.349858824 |
| <b>CELLULAR PROCESSES</b>                                             |                                                              |          |             |
| PAAG_06192                                                            | Actin-related protein 2/3 complex subunit 4                  | 1192.57  | *           |
| PAAG_07185                                                            | Actin-related protein 2/3 complex subunit 5                  | 3374.47  | *           |
| PAAG_07702                                                            | ADP-ribosylation factor                                      | 1058.35  | *           |
| PAAG_05061                                                            | AhpC/TSA family protein                                      | 2253.84  | *           |
| PAAG_00875                                                            | ARP2/3 actin-organizing complex subunit Sop2                 | 792.17   | *           |
| PAAG_02409                                                            | WD repeat domain phosphoinositide-interacting protein        | 1049.41  | *           |
| PAAG_01500                                                            | GTP-binding protein SAS1                                     | 2012.19  | 1.568312167 |
| PAAG_05663                                                            | Arp2/3 complex 34 kDa subunit                                | 1000.36  | 3.034358438 |
| <b>SIGNALING AND CELLULAR PROCESSES</b>                               |                                                              |          |             |
| PAAG_08880                                                            | Cell division control protein                                | 1112.17  | *           |
| PAAG_00004                                                            | Coronin                                                      | 3410.12  | *           |

|                                           |                                                           |         |             |
|-------------------------------------------|-----------------------------------------------------------|---------|-------------|
| PAAG_07958                                | Fimbrin                                                   | 1705.51 | *           |
| PAAG_03551                                | Calcineurin subunit B                                     | 1512.49 | *           |
| PAAG_08247                                | Calmodulin                                                | 1990.66 | 1.404947596 |
| PAAG_06751                                | DNA damage checkpoint protein rad24                       | 15208.9 | 1.537257535 |
| PAAG_00773                                | DNA damage checkpoint protein rad24                       | 5441.85 | 1.750672504 |
| PAAG_08028                                | GTP-binding protein ypt1                                  | 1856.47 | 1.915540783 |
| <b>GENETIC INFORMATION PROCESSING</b>     |                                                           |         |             |
| <b>Chromosome and associated proteins</b> |                                                           |         |             |
| PAAG_02619                                | Uncharacterized protein                                   | 982.12  | *           |
| PAAG_05476                                | ADP-ribosylation factor family protein                    | 818.37  | *           |
| PAAG_12620                                | Uncharacterized protein                                   | 1005.73 | *           |
| PAAG_00106                                | Histone acetyltransferase type B catalytic subunit        | 1028.61 | *           |
| PAAG_07098                                | Histone H4                                                | 4752.12 | 1.336427477 |
| PAAG_02820                                | Obg-like ATPase 1                                         | 1162.41 | 1.336427477 |
| PAAG_08918                                | Histone H2B                                               | 840.43  | 1.41906754  |
| PAAG_00126                                | Histone H4                                                | 4787.73 | 1.462284582 |
| PAAG_08471                                | Histone H2A                                               | 1078.66 | 1.803988368 |
| <b>Transcription machinery</b>            |                                                           |         |             |
| PAAG_01062                                | Small nuclear ribonucleoprotein Sm D1                     | 1765.8  | *           |
| PAAG_08223                                | Small nuclear ribonucleoprotein Sm D3                     | 960.98  | *           |
| PAAG_02437                                | U2 small nuclear ribonucleoprotein B                      | 884.55  | *           |
| PAAG_07785                                | 116 kDa U5 small nuclear ribonucleoprotein component      | 767.68  | *           |
| PAAG_01597                                | Uncharacterized protein                                   | 1487.41 | *           |
| PAAG_02033                                | Mediator of RNA polymerase II transcription subunit 31    | 762.91  | *           |
| PAAG_06996                                | G-protein complex beta subunit CpcB                       | 2558.17 | 1.896480852 |
| PAAG_02537                                | Small nuclear ribonucleoprotein Sm D2                     | 838.81  | 2.1382762   |
| PAAG_07296                                | single-strand DNA binding protein family                  | 7351.35 | 3.18993317  |
| <b>Translation</b>                        |                                                           |         |             |
| PAAG_00339                                | Poly(A)+ RNA export protein                               | 750.12  | *           |
| PAAG_00244                                | Polyadenylate-binding protein                             | 904.88  | *           |
| PAAG_07707                                | Ribosomal protein                                         | 2034.46 | *           |
| PAAG_00783                                | Serine/threonine-protein phosphatase                      | 1287.19 | *           |
| PAAG_08702                                | Seryl-tRNA synthetase                                     | 787.75  | *           |
| PAAG_05103                                | Threonyl-tRNA synthetase                                  | 1593.24 | *           |
| PAAG_07841                                | Uncharacterized protein                                   | 27243.5 | *           |
| PAAG_08611                                | Uncharacterized protein                                   | 847.38  | *           |
| PAAG_01050                                | 60S ribosomal protein L10-B                               | 1764.72 | *           |
| PAAG_00088                                | 60S ribosomal protein L3                                  | 858.39  | *           |
| PAAG_00648                                | 60S ribosomal protein L33-B                               | 825.72  | *           |
| PAAG_03019                                | 60S ribosomal protein L6                                  | 878.89  | *           |
| PAAG_00347                                | 60S ribosomal protein L9-B                                | 3215.52 | *           |
| PAAG_04743                                | Casein kinase II subunit alpha                            | 965.73  | *           |
| PAAG_04662                                | Cleavage and polyadenylation specificity factor subunit 5 | 2944.7  | *           |
| PAAG_04193                                | CysteinyI-tRNA synthetase                                 | 833.13  | *           |
| PAAG_12263                                | Eukaryotic translation initiation factor 3 subunit M      | 901.03  | *           |
| PAAG_06891                                | mRNA binding post-transcriptional regulator (Csx1)        | 1030.51 | *           |

|                                         |                                                           |         |             |
|-----------------------------------------|-----------------------------------------------------------|---------|-------------|
| PAAG_03941                              | G4 quadruplex nucleic acid binding protein                | 717.6   | *           |
| PAAG_11057                              | Uncharacterized protein                                   | 813.7   | *           |
| PAAG_06792                              | 60S ribosomal protein L34-B                               | 866.27  | 1.41906754  |
| PAAG_09096                              | Uncharacterized protein                                   | 2804.24 | 1.41906754  |
| PAAG_05704                              | 40S ribosomal protein S13-1                               | 5253.87 | 1.433329435 |
| PAAG_03816                              | 40S ribosomal protein S4                                  | 1032.77 | 1.462284582 |
| PAAG_03322                              | 40S ribosomal protein S20                                 | 1112.85 | 1.462284582 |
| PAAG_00430                              | 60S ribosomal protein L2                                  | 5063.03 | 1.552707215 |
| PAAG_06367                              | 30S ribosomal protein S17P                                | 2372.65 | 1.568312167 |
| PAAG_00205                              | Uncharacterized protein                                   | 1028.5  | 1.665291179 |
| PAAG_03556                              | Elongation factor 1-gamma 1                               | 3103.08 | 1.716006899 |
| PAAG_03028                              | Elongation factor 1-beta                                  | 1849.14 | 2.033991215 |
| PAAG_03828                              | 40S ribosomal protein S9                                  | 4875.23 | 2.054433269 |
| PAAG_01347                              | Actin cytoskeleton protein (VIP1)                         | 1443.21 | 1.50681778  |
| PAAG_04814                              | Nucleic acid-binding protein                              | 1326.46 | 1.87761057  |
| PAAG_00689                              | ATP-dependent RNA helicase eIF4A                          | 1078.94 | 2.203396474 |
| PAAG_01834                              | 60S ribosomal protein L16                                 | 1373.58 | 2.293318702 |
| PAAG_09043                              | 40S ribosomal protein S2                                  | 2065.17 | 2.435129616 |
| PAAG_05778                              | 40S ribosomal protein S19                                 | 2068    | 2.484322599 |
| PAAG_07182                              | 40S ribosomal protein S7                                  | 888.36  | 2.801065755 |
| PAAG_01435                              | 40S ribosomal protein S16                                 | 3546.19 | 3.095656485 |
| PAAG_02889                              | Ribosomal protein L35                                     | 1607.76 | 3.034358438 |
| <b>Mitochondrial biogenesis</b>         |                                                           |         |             |
| PAAG_04458                              | Prohibitin-1                                              | 965.54  | *           |
| PAAG_00109                              | Mitochondrial intermembrane space translocase subunit Tim | 1153.25 | *           |
| PAAG_09072                              | Mitochondrial nuclease                                    | 1445.23 | *           |
| PAAG_12425                              | Mitochondrial outer membrane protein porin                | 1052.61 | *           |
| PAAG_08620                              | ADP. ATP carrier protein                                  | 1253.36 | *           |
| PAAG_00797                              | Mitochondrial protein import protein MAS5                 | 1654.77 | *           |
| <b>FOLDING. SORTING AND DEGRADATION</b> |                                                           |         |             |
| PAAG_00763                              | Proteasome component PUP3                                 | 3662.21 | *           |
| PAAG_03687                              | Proteasome endopeptidase complex                          | 1372.89 | *           |
| PAAG_00071                              | Proteasome subunit alpha type                             | 1236.49 | *           |
| PAAG_08418                              | Proteasome subunit beta                                   | 1172.59 | *           |
| PAAG_00770                              | 26S protease regulatory subunit                           | 881.91  | *           |
| PAAG_01926                              | Uncharacterized protein                                   | 945.7   | *           |
| PAAG_07037                              | Calnexin                                                  | 1089.94 | *           |
| PAAG_07589                              | SNARE domain-containing protein                           | 902.64  | *           |
| PAAG_08006                              | V-SNARE                                                   | 1225.94 | *           |
| PAAG_00852                              | Proteasome endopeptidase complex                          | 1219.14 | 2.585709628 |
| PAAG_06536                              | Ubiquitin                                                 | 1659.56 | 2.664456293 |
| PAAG_07080                              | Ubiquitin                                                 | 1676.59 | 2.915379653 |
| PAAG_07802                              | Proteasome subunit alpha type                             | 1641.06 | 2.944679677 |
| PAAG_00782                              | Small COPII coat GTPase sar1                              | 2428.83 | 3.596639623 |
| PAAG_00866                              | Proteasome component C5                                   | 1149.46 | 3.78104355  |
| PAAG_01941                              | Proteasome subunit alpha type                             | 1048.74 | 3.78104355  |

| CELL RESCUE. DEFENSE AND VIRULENCE               |                                          |         |             |  |
|--------------------------------------------------|------------------------------------------|---------|-------------|--|
| PAAG_05716                                       | Carbonic anhydrase                       | 2849.07 | *           |  |
| PAAG_06947                                       | Gamma-glutamyltranspeptidase             | 745.77  | *           |  |
| PAAG_05292                                       | Glutathione reductase                    | 2009.44 | *           |  |
| PAAG_06237                                       | Urease accessory protein ureG            | 1325.73 | *           |  |
| PAAG_01465                                       | Carbonic anhydrase                       | 8067.02 | 1.840431425 |  |
| PAAG_03333                                       | Formamidase                              | 957.69  | 2.484322599 |  |
| Detoxification                                   |                                          |         |             |  |
| PAAG_02725                                       | Superoxide dismutase Fe/Mn               | 3674.03 | 2.117000017 |  |
| PAAG_03216                                       | Mitochondrial peroxiredoxin PRX1         | 7829.13 | 1.648721271 |  |
| PAAG_06175                                       | Peroxisomal matrix protein               | 2592.75 | 1.69893226  |  |
| PAAG_03931                                       | Glutathione S-transferase Gst3           | 1523.77 | 2.1382762   |  |
| PAAG_08859                                       | Peroxisomal multifunctional enzyme       | 1347.9  | 1.390968147 |  |
| PAAG_08931                                       | Glutamate carboxypeptidase               | 827.03  | 2.316366916 |  |
| PAAG_04164                                       | Superoxide dismutase                     | 1569.92 | 2.509290432 |  |
| PAAG_02364                                       | Thioredoxin                              | 1639.01 | 3.095656485 |  |
| PAAG_01368                                       | Benzoate 4-monooxygenase cytochrome P450 | 800.11  | *           |  |
| Stress response/Chaperones and folding catalysts |                                          |         |             |  |
| PAAG_07775                                       | Heat shock protein SSB1                  | 813.79  | 2.1382762   |  |
| PAAG_02116                                       | Hsp70                                    | 737.97  | *           |  |
| PAAG_11262                                       | Hsp7-like protein                        | 6986.88 | *           |  |
| PAAG_01262                                       | Hsp70-like protein                       | 4095.83 | 1.41906754  |  |
| PAAG_06811                                       | Heat shock protein STI1                  | 1282.75 | 1.433329435 |  |
| PAAG_07750                                       | Heat shock protein Hsp88                 | 4564.28 | 1.599994191 |  |
| PAAG_03334                                       | Peptidyl-prolyl cis-trans isomerase D    | 1423.35 | 1.616074385 |  |
| PAAG_03292                                       | Peroxidase                               | 1335.5  | 1.323129814 |  |
| PAAG_08260                                       | Hsp90 co-chaperone Cdc37                 | 1503.88 | 2.159766213 |  |
| PAAG_05788                                       | Peptidyl-prolyl cis-trans isomerase      | 1468.5  | 2.611696417 |  |
| HYPOTHETICAL PROTEINS                            |                                          |         |             |  |
| PAAG_00090                                       | Uncharacterized protein                  | 1514.25 | *           |  |
| PAAG_00471                                       | Uncharacterized protein                  | 1217.01 | *           |  |
| PAAG_00541                                       | Uncharacterized protein                  | 1601.72 | *           |  |
| PAAG_01045                                       | Uncharacterized protein                  | 3809.36 | *           |  |
| PAAG_01124                                       | Uncharacterized protein                  | 1449.93 | *           |  |
| PAAG_01231                                       | Uncharacterized protein                  | 740.54  | *           |  |
| PAAG_02154                                       | Uncharacterized protein                  | 2371.2  | *           |  |
| PAAG_02768                                       | Uncharacterized protein                  | 1079.22 | *           |  |
| PAAG_02985                                       | Uncharacterized protein                  | 890.65  | *           |  |
| PAAG_03092                                       | Uncharacterized protein                  | 1775.68 | *           |  |
| PAAG_03967                                       | Uncharacterized protein                  | 979.14  | *           |  |
| PAAG_04037                                       | Uncharacterized protein                  | 1046.63 | *           |  |
| PAAG_04358                                       | Uncharacterized protein                  | 900.14  | *           |  |
| PAAG_04647                                       | Uncharacterized protein                  | 933.51  | *           |  |
| PAAG_05388                                       | Uncharacterized protein                  | 796.82  | *           |  |
| PAAG_05550                                       | Uncharacterized protein                  | 1650.16 | *           |  |
| PAAG_07035                                       | Uncharacterized protein                  | 795.57  | *           |  |

|            |                                                               |          |             |
|------------|---------------------------------------------------------------|----------|-------------|
| PAAG_07886 | Uncharacterized protein                                       | 718.56   | *           |
| PAAG_07957 | Uncharacterized protein                                       | 1951.39  | *           |
| PAAG_07989 | Uncharacterized protein                                       | 1618.79  | *           |
| PAAG_11844 | Uncharacterized protein                                       | 1414.51  | *           |
| PAAG_12508 | Uncharacterized protein                                       | 1601.67  | *           |
| PAAG_02608 | Uncharacterized protein                                       | 2025.05  | *           |
| PAAG_05041 | Altered inheritance of mitochondria protein 24. mitochondrial | 887.68   | *           |
| PAAG_03701 | BAR domain-containing protein                                 | 868.29   | *           |
| PAAG_01875 | Uncharacterized protein                                       | 940.14   | *           |
| PAAG_01135 | Uncharacterized protein                                       | 877.51   | *           |
| PAAG_00743 | Zinc metalloprotease                                          | 1067.74  | *           |
| PAAG_01399 | NAD dependent epimerase/dehydratase family protein            | 784.47   | *           |
| PAAG_01717 | Uncharacterized protein                                       | 768.17   | *           |
| PAAG_01928 | Peroxisomal dehydratase                                       | 898.55   | *           |
| PAAG_05019 | Uncharacterized protein                                       | 11596.59 | 1.896480852 |
| PAAG_03421 | Uncharacterized protein                                       | 1227.75  | 1.323129814 |
| PAAG_07772 | Uncharacterized protein                                       | 1237.8   | 1.404947596 |
| PAAG_01854 | Uncharacterized protein                                       | 1151.47  | 1.733253039 |
| PAAG_05259 | Uncharacterized protein                                       | 2698.97  | 2.181472203 |
| PAAG_00335 | Uncharacterized protein                                       | 1782.49  | 2.203396474 |
| PAAG_00579 | Uncharacterized protein                                       | 1167.2   | 2.225540955 |
| PAAG_07262 | Oxidoreductase                                                | 1372.88  | 2.459603053 |
| PAAG_01321 | Oxidoreductase 2-nitropropane dioxygenase family              | 1373.44  | 1.954237353 |

<sup>a</sup> Identification of differentially regulated proteins from *P. lutzii* genome database (<https://www.ncbi.nlm.nih.gov/genome/?term=paracoccidioides>) using ProteinLynx Global server v.3.0.2 (PLGS) (Water Corporation. Manchester. UK);

<sup>b</sup> Proteins annotation from *P. lutzii* genome database or by homology in BlastP in NCBI database ([https://blast.ncbi.nlm.nih.gov/Blast.cgi?PROGRAM=blastp&PAGE\\_TYPE=BlastSearch&LINK\\_LOC=blasthome](https://blast.ncbi.nlm.nih.gov/Blast.cgi?PROGRAM=blastp&PAGE_TYPE=BlastSearch&LINK_LOC=blasthome));

<sup>c</sup> PLGS score is the result of different mathematical models for peptide and fragment assignment prediction;

<sup>d</sup> Fold-change values were obtained by dividing the values of protein abundance (in fmol) from *P. lutzii* yeast cells during nitrogen limiting conditions by cultured in Yeast Nitrogen Base (YNB) without amino acids and ammonium sulfate (Sigma-Aldrich®) supplemented with 10mM glutamine and 10mM proline nitrogen sources. Proteins with a minimum fold-change of 30% were considered to be regulated;

\* Proteins identified only in *P. lutzii* cultured in 10 mM proline nitrogen source.

**Table S3.** Down-regulated proteins in *P. lutzii* under NCR conditions.

| Accession number <sup>a</sup>           | Protein name <sup>b</sup>                                  | Score <sup>c</sup> | Fold change <sup>d</sup> |
|-----------------------------------------|------------------------------------------------------------|--------------------|--------------------------|
| <b>GENETIC INFORMATION PROCESSING</b>   |                                                            |                    |                          |
| <b>Translation</b>                      |                                                            |                    |                          |
| PAAG_01433                              | 40S ribosomal protein S14                                  | 895.21             | *                        |
| PAAG_05946                              | 40S ribosomal protein S27                                  | 1098.08            | *                        |
| PAAG_05117                              | Aspartyl-tRNA synthetase                                   | 926.51             | *                        |
| PAAG_04511                              | ATP-dependent RNA helicase SUB2                            | 1148.14            | *                        |
| PAAG_04396                              | Casein kinase II subunit beta                              | 885.2              | *                        |
| PAAG_01050                              | Cytosolic large ribosomal subunit protein L30              | 2255.3             | *                        |
| PAAG_08172                              | Lysine--tRNA ligase                                        | 846.52             | *                        |
| PAAG_04691                              | Uncharacterized protein                                    | 1136.13            | *                        |
| PAAG_04958                              | Eukaryotic translation initiation factor 6                 | 2682.7             | 0.522045789              |
| PADG_06525                              | 40S ribosomal protein S1                                   | 1329.16            | 0.301194198              |
| PAAG_06320                              | 60S ribosomal protein L13                                  | 2011.37            | 0.319819026              |
| PAAG_01785                              | 40S ribosomal protein S3                                   | 1751.42            | 0.343008499              |
| PAAG_05805                              | 40S ribosomal protein S21                                  | 2125.76            | 0.49658531               |
| PAAG_05484                              | 40S ribosomal protein S5                                   | 1524.23            | 0.548811623              |
| PAAG_08888                              | 60S ribosomal protein L4-A                                 | 2081.11            | 0.58274824               |
| PAAG_06487                              | 60S ribosomal protein L7-C                                 | 902.78             | 0.625002269              |
| PAAG_11418                              | Elongation factor 1-alpha                                  | 2254.68            | 0.63128364               |
| PAAG_00801                              | 60S acidic ribosomal protein P0                            | 1991.82            | 0.644036423              |
| PAAG_04998                              | 60S ribosomal protein L8-B                                 | 2445.15            | 0.677056884              |
| PAAG_02921                              | Elongation factor Tu                                       | 1359.54            | *                        |
| PAAG_04571                              | Nascent polypeptide-associated complex subunit alpha       | 2494.82            | 0.151071811              |
| <b>Transcription machinery</b>          |                                                            |                    |                          |
| PAAG_00727                              | Mitosis protein dim1                                       | 1375.32            | *                        |
| PAAG_04496                              | Nascent polypeptide-associated complex subunit beta        | 1155.68            | 0.26184566               |
| PAAG_01097                              | Poly(RC)-binding protein                                   | 879.46             | *                        |
| <b>FOLDING. SORTING AND DEGRADATION</b> |                                                            |                    |                          |
| PAAG_02255                              | mRNA decapping hydrolase                                   | 1118.01            | *                        |
| PAAG_12063                              | Protein transporter SEC23                                  | 1042.56            | 0.49658531               |
| PAAG_02907                              | 26S proteasome non-ATPase regulatory subunit 10            | 1008.82            | *                        |
| PAAG_08141                              | Proteasome subunit alpha type                              | 1225.3             | 0.458406024              |
| <b>SIGNALING AND CELLULAR PROCESSES</b> |                                                            |                    |                          |
| PAAG_00317                              | Septin 4                                                   | 1150.03            | *                        |
| PAAG_04042                              | Sporulation-regulated protein                              | 885.78             | *                        |
| PAAG_03309                              | Suaprga1                                                   | 1255.1             | *                        |
| PAAG_08058                              | cofilin                                                    | 967.66             | *                        |
| PAAG_08093                              | GTP-binding protein ypt3                                   | 1335.57            | *                        |
| PAAG_03161                              | GTP-binding protein ypt5                                   | 1680.55            | *                        |
| PAAG_01602                              | Ras-like GTP-binding protein                               | 1045.44            | *                        |
| PAAG_03669                              | Phosphatidylglycerol/phosphatidylinositol transfer protein | 1520.4             | *                        |
| PAAG_06344                              | Rab GDP dissociation inhibitor                             | 1394.62            | *                        |
| PAAG_03532                              | Actin                                                      | 2121.1             | 0.527292432              |

|                                                                       |                                                                  |          |             |
|-----------------------------------------------------------------------|------------------------------------------------------------------|----------|-------------|
| PAAG_01647                                                            | Tubulin alpha chain                                              | 2875.62  | 0.644036423 |
| <b>ENERGY</b>                                                         |                                                                  |          |             |
| <b>Glycolysis and gluconeogenesis</b>                                 |                                                                  |          |             |
| PAAG_02050                                                            | Pyruvate decarboxylase                                           | 1354.24  | *           |
| PAAG_01534                                                            | Pyruvate dehydrogenase E1 component subunit beta                 | 1195.73  | *           |
| PAAG_11035                                                            | Acetyltransferase component of pyruvate dehydrogenase complex    | 2275.17  | 0.301194198 |
| PADG_02411                                                            | Glyceraldehyde-3-phosphate dehydrogenase                         | 4028.65  | 0.571209062 |
| PAAG_06473                                                            | Mannitol-1-phosphate 5-dehydrogenase                             | 892.82   | 0.670320042 |
| <b>Tricarboxylic-acid pathway</b>                                     |                                                                  |          |             |
| PAAG_07729                                                            | Isocitrate dehydrogenase [NAD] subunit. mitochondrial            | 1111.89  | *           |
| PAAG_05415                                                            | Succinate dehydrogenase [ubiquinone] cytochrome b small subunit  | 910.29   | *           |
| PAAG_00417                                                            | Succinate--CoA ligase [ADP-forming] subunit alpha. mitochondrial | 892.95   | *           |
| <b>Oxidation of fatty acids</b>                                       |                                                                  |          |             |
| PAAG_07786                                                            | Acetyl-CoA acetyltransferase                                     | 1673.49  | *           |
| PAAG_05454                                                            | Acyl-CoA dehydrogenase                                           | 793.59   | 0.114177608 |
| <b>Electron transport and membrane-associated energy conservation</b> |                                                                  |          |             |
| PAAG_04820                                                            | ATP synthase subunit alpha                                       | 1259.84  | *           |
| <b>METABOLISM</b>                                                     |                                                                  |          |             |
| <b>Amino acid metabolism</b>                                          |                                                                  |          |             |
| PAAG_03978                                                            | 3-hydroxyisobutyrate dehydrogenase                               | 1672.59  | *           |
| PAAG_08405                                                            | Cystathionine beta-lyase                                         | 1000.4   | *           |
| <b>Fatty acid biosynthesis and Lipid metabolism</b>                   |                                                                  |          |             |
| PAAG_03024                                                            | 3-ketodihydrosphingosine reductase tsc10                         | 1072.59  | *           |
| PAAG_06309                                                            | Enoyl-CoA hydratase                                              | 987.56   | 0.075020047 |
| <b>Metabolism of cofactors and vitamins</b>                           |                                                                  |          |             |
| PAAG_02071                                                            | Glutamyl-tRNA synthetase                                         | 879.68   | *           |
| PAAG_03345                                                            | Phosphotyrosine protein phosphatase                              | 6980.18  | 0.436049294 |
| PAAG_12076                                                            | NAD(P)H:quinone oxidoreductase. type IV                          | 12494.06 | 0.406569669 |
| <b>SIGNALING AND CELLULAR PROCESSES</b>                               |                                                                  |          |             |
| <b>Stress response/Chaperones and folding catalysts</b>               |                                                                  |          |             |
| PAAG_05142                                                            | 10 kDa heat shock protein. mitochondrial                         | 24841.12 | 0.697676316 |
| PAAG_01778                                                            | Peptidyl-prolyl cis-trans isomerase                              | 1508.67  | 0.225372653 |
| PAAG_05679                                                            | Heat shock protein                                               | 5649     | 0.683861412 |
| <b>Detoxification</b>                                                 |                                                                  |          |             |
| PAAG_04424                                                            | Glutathione peroxidase                                           | 1304.27  | 0.571209062 |
| <b>HYPOTHETICAL PROTEINS</b>                                          |                                                                  |          |             |
| PAAG_06462                                                            | Diazepam-binding inhibitor                                       | 1748.96  | *           |
| PAAG_00297                                                            | Uncharacterized protein                                          | 1243.69  | *           |
| PAAG_00340                                                            | Uncharacterized protein                                          | 1222.61  | *           |
| PAAG_00928                                                            | Uncharacterized protein                                          | 1505.13  | *           |
| PAAG_05564                                                            | Uncharacterized protein                                          | 1345.97  | *           |
| PAAG_07405                                                            | Uncharacterized protein                                          | 2187.11  | *           |
| PAAG_11812                                                            | Uncharacterized protein                                          | 946.94   | *           |

<sup>a</sup> Identification of differentially regulated proteins from *P. lutzii* genome database (<https://www.ncbi.nlm.nih.gov/genome/?term=paracoccidioides>) using ProteinLynx Global server v.3.0.2 (PLGS) (Water Corporation, Manchester, UK);

<sup>b</sup> Proteins annotation from *P. lutzii* genome database or by homology in BlastP in NCBI database ([https://blast.ncbi.nlm.nih.gov/Blast.cgi?PROGRAM=blastp&PAGE\\_TYPE=BlastSearch&LINK\\_LOC=blasthome](https://blast.ncbi.nlm.nih.gov/Blast.cgi?PROGRAM=blastp&PAGE_TYPE=BlastSearch&LINK_LOC=blasthome));

<sup>c</sup> PLGS score is the result of different mathematical models for peptide and fragment assignment prediction;

<sup>d</sup> Fold-change values were obtained by dividing the values of protein abundance (in fmol) from *P. lutzii* yeast cells during nitrogen limiting conditions by cultured in Yeast Nitrogen Base (YNB) without amino acids and ammonium sulfate (Sigma-Aldrich®) supplemented with 10mM glutamine and 10mM proline nitrogen sources. Proteins with a minimum fold-change of 30% were considered to be regulated;

\* Proteins identified only in *P. lutzii* cultured in 10 mM proline nitrogen source.

**Table S4.** Amino acid biosynthesis and degradation of the up-regulated proteins under NCR-proline conditions.

| <b>BIOSYNTHESIS</b>                  |                                                         |                                                     |
|--------------------------------------|---------------------------------------------------------|-----------------------------------------------------|
| <b>Accession number <sup>1</sup></b> | <b>Protein name</b>                                     | <b>Metabolic pathway <sup>*</sup></b>               |
| PAAG_02859                           | Adenosylhomocysteinase                                  | Cysteine and methionine metabolism                  |
| PAAG_07327                           | Arginine biosynthesis bifunctional protein ArgJ         | Arginine biosynthesis                               |
| PAAG_08065                           | Aspartate-semialdehyde dehydrogenase                    | Glycine, serine and threonine metabolism            |
| PAAG_00285                           | Imidazole glycerol phosphate synthase hisHF             | Histidine metabolism                                |
| PAAG_06096                           | Phospho-2-dehydro-3-deoxyheptonate aldolase             | Phenylalanine, tyrosine and tryptophan biosynthesis |
| PAAG_07003                           | Glutamine synthetase                                    | Arginine biosynthesis                               |
| PAAG_05328                           | 3-isopropylmalate dehydrogenase                         | Valine, leucine and isoleucine biosynthesis         |
| PAAG_06217                           | Acetylornithine aminotransferase                        | Arginine biosynthesis                               |
| PAAG_07114                           | Argininosuccinate synthase                              | Arginine biosynthesis                               |
| PAAG_07760                           | Threonine synthase                                      | Glycine, serine and threonine metabolism            |
| PAAG_07813                           | Cysteine synthase                                       | Cysteine and methionine metabolism                  |
| PAAG_07605                           | Acetolactate synthase small subunit                     | Valine, leucine and isoleucine biosynthesis         |
| PAAG_06387                           | Homoisocitrate dehydrogenase                            | Lysine biosynthesis                                 |
| PAAG_07689                           | NADP-specific Glutamate dehydrogenase                   | Arginine biosynthesis                               |
| PAAG_01991                           | Homoserine dehydrogenase                                | Glycine, serine and threonine metabolism            |
| PAAG_02217                           | Isochorismatase domain-containing protein               | Phenylalanine, tyrosine and tryptophan biosynthesis |
| <b>DEGRADATION</b>                   |                                                         |                                                     |
| <b>Access number <sup>1</sup></b>    | <b>Protein name</b>                                     | <b>Metabolic pathway <sup>*</sup></b>               |
| PAAG_08163                           | Fumarylacetoacetase                                     | Tyrosine degradation                                |
| PAAG_02644                           | Kynurenine-oxoglutarate transaminase                    | Tyrosine degradation                                |
| PAAG_08100                           | O-acetylhomoserine (Thiol)-lyase                        | Cysteine and methionine metabolism                  |
| PAAG_01302                           | S-methyl-5'-thioadenosine phosphorylase                 | Cysteine and methionine metabolism                  |
| PAAG_04443                           | Spermidine synthase                                     | Cysteine and methionine metabolism                  |
| PAAG_03138                           | Alanine-glyoxylate aminotransferase                     | Alanine, aspartate and glutamate metabolism         |
| PAAG_00691                           | Fumarylacetoacetate hydrolase domain-containing protein | Tyrosine metabolism                                 |
| PAAG_01568                           | Glycine cleavage system P protein                       | Glycine, serine and threonine metabolism            |
| PAAG_08512                           | Serine hydroxymethyltransferase                         | Glycine, serine and threonine metabolism            |
| PAAG_07036                           | Methylmalonate-semialdehyde dehydrogenase               | Valine, leucine and isoleucine degradation          |
| PAAG_01158                           | phenylpyruvate tautomerase                              | Tyrosine metabolism                                 |
| PAAG_07412                           | Serine hydroxymethyltransferase                         | Glycine, serine and threonine metabolism            |
| PAAG_08718                           | Succinate-semialdehyde dehydrogenase                    | Alanine, aspartate and glutamate metabolism         |
| PAAG_01310                           | 2-oxoisovalerate dehydrogenase subunit alpha            | Valine, leucine and isoleucine degradation          |
| PAAG_05253                           | Delta-1-pyrroline-5-carboxylate dehydrogenase           | Alanine, aspartate and glutamate metabolism         |
| PAAG_03045                           | Aminomethyltransferase                                  | Glycine, serine and threonine metabolism            |
| PAAG_01974                           | Mitochondrial methylglutaconyl-CoA hydratase            | Valine, leucine and isoleucine degradation          |

<sup>1</sup> Accession number and protein available in Uniprot databases (<https://www.uniprot.org/>);<sup>\*</sup> Metabolic pathway available in Kegg pathway database (<https://www.genome.jp/kegg/pathway.html>).

**Table S5.** Proteins up-regulated in *P. lutzii* related with adherence under NCR-proline conditions.

| Accession number <sup>1</sup> | Protein name                                                                   | Faapred <sup>2</sup> |
|-------------------------------|--------------------------------------------------------------------------------|----------------------|
| PAAG_08065                    | Aspartate-semialdehyde dehydrogenase                                           | 0.78097396           |
| PAAG_02769                    | Dihydrolipoamide acetyltransferase component of pyruvate dehydrogenase complex | 0.7962463            |
| PAAG_00285                    | Imidazole glycerol phosphate synthase hisHF                                    | 0.74109549           |
| PAAG_08100                    | O-acetylhomoserine (Thiol)-lyase                                               | 0.63380869           |
| PAAG_06217                    | Acetylornithine aminotransferase                                               | 0.7257679            |
| PAAG_07605                    | Acetolactate synthase small subunit                                            | 0.03256339           |
| PAAG_03045                    | Aminomethyltransferase                                                         | 0.47874841           |
| PAAG_06906                    | Adenine phosphoribosyltransferase                                              | 0.75626885           |
| PAAG_02354                    | Serine 3-dehydrogenase                                                         | 0.54436313           |
| PAAG_06643                    | Uracil phosphoribosyltransferase                                               | 0.54851004           |
| PAAG_08349                    | C-1-tetrahydrofolate synthase                                                  | 0.72916011           |
| PAAG_08856                    | Nicotinate-nucleotide pyrophosphorylase [carboxylating]                        | 0.55258796           |
| PAAG_06215                    | Hydroxymethylglutaryl-CoA lyase                                                | 0.68521882           |
| PAAG_00403                    | Alcohol dehydrogenase                                                          | 0.54396443           |
| PAAG_07921                    | cytochrome c oxidase assembly factor 6                                         | 0.29603461           |
| PAAG_02664                    | 3-ketoacyl-CoA thiolase                                                        | 0.73062744           |
| PAAG_07185                    | Actin-related protein 2/3 complex subunit 5                                    | 0.67173705           |
| PAAG_00875                    | ARP2/3 actin-organizing complex subunit Sop2                                   | 0.6649768            |
| PAAG_02033                    | Mediator of RNA polymerase II transcription subunit 31                         | 0.30093731           |
| PAAG_06996                    | G-protein complex beta subunit CpcB                                            | 0.29293222           |
| PAAG_07296                    | single-strand DNA binding protein family                                       | 0.41982781           |
| PAAG_03941                    | G4 quadruplex nucleic acid binding protein                                     | 0.62700526           |
| PAAG_06792                    | 60S ribosomal protein L34-B                                                    | 0.31310686           |
| PAAG_09096                    | Uncharacterized protein                                                        | 0.45667675           |
| PAAG_01347                    | Actin cytoskeleton protein (VIP1)                                              | 0.58667185           |
| PAAG_07182                    | 40S ribosomal protein S7                                                       | 0.72150878           |
| PAAG_01435                    | 40S ribosomal protein S16                                                      | 0.080352837          |
| PAAG_09072                    | Mitochondrial nuclease                                                         | 0.2554477            |
| PAAG_08418                    | Proteasome subunit beta                                                        | 0.35173182           |
| PAAG_07037                    | Calnexin                                                                       | 0.56053173           |
| PAAG_05716                    | Carbonic anhydrase                                                             | 0.6073389            |
| PAAG_06237                    | Urease accessory protein ureG                                                  | 0.70113207           |
| PAAG_02364                    | Thioredoxin                                                                    | 0.72402533           |
| PAAG_03292                    | Peroxidase                                                                     | 0.6156496            |
| PAAG_00090                    | Uncharacterized protein                                                        | 0.2257914            |
| PAAG_00541                    | Uncharacterized protein                                                        | 0.037364734          |
| PAAG_01124                    | Uncharacterized protein                                                        | 0.39361832           |
| PAAG_02154                    | Uncharacterized protein                                                        | 0.43847169           |
| PAAG_02768                    | Uncharacterized protein                                                        | 0.47654572           |
| PAAG_02985                    | Uncharacterized protein                                                        | 0.74640492           |
| PAAG_03967                    | Uncharacterized protein                                                        | 0.023074998          |
| PAAG_05388                    | Uncharacterized protein                                                        | 0.77153754           |
| PAAG_05550                    | Uncharacterized protein                                                        | 0.64984866           |

|            |                                                               |             |
|------------|---------------------------------------------------------------|-------------|
| PAAG_07035 | Uncharacterized protein                                       | 0.44492444  |
| PAAG_07886 | Uncharacterized protein                                       | 0.4090276   |
| PAAG_07957 | Uncharacterized protein                                       | 0.37538801  |
| PAAG_02608 | Uncharacterized protein                                       | 0.025191829 |
| PAAG_05041 | Altered inheritance of mitochondria protein 24, mitochondrial | 0.54592048  |
| PAAG_01399 | NAD dependent epimerase/dehydratase family protein            | 0.046511185 |
| PAAG_00335 | Uncharacterized protein                                       | 0.75377236  |
| PAAG_00579 | Uncharacterized protein                                       | 0.23839148  |
| PAAG_01556 | FAD dependent oxidoreductase superfamily                      | 0.58681603  |
| PAAG_08954 | GTP cyclohydrolase                                            | 0.70326017  |
| PAAG_07262 | Oxidoreductase                                                | 0.58907821  |
| PAAG_01321 | Oxidoreductase 2-nitropropane dioxygenase family              | 0.42844503  |

---

<sup>1</sup> Accession numbers was obtained in NCBI database (<https://www.ncbi.nlm.nih.gov/>);

<sup>2</sup> Prediction of adhesins performed in FaaPred database (<http://bioinfo.icgeb.res.in/faap/svmtool1.php>).
